# Supplementary material for: Advanced Simulation of Quartz Flotation Using Micro-Nanobubbles by Hybrid Serving of Historical Data (HD) and Deep Learning (DL) Methods
Source: MDPI journal article supplement (doi:10.3390/min13010128), 2023-01-16
Supplement: s1 [file s1]

# Supplementary Data

**Table S1.** Operating variables and experimental results.

| Air flow rate<br>(l/h) | Impeller speed<br>(rpm) | MNBs diameter<br>( $\mu\text{m}$ ) | particle size<br>( $\mu\text{m}$ ) | Recovery<br>(%) |
|------------------------|-------------------------|------------------------------------|------------------------------------|-----------------|
| 30                     | 600                     | 0                                  | 300                                | 20.99           |
| 30                     | 600                     | 0                                  | 212                                | 35.98           |
| 30                     | 600                     | 0                                  | 106                                | 65.73           |
| 30                     | 700                     | 0                                  | 300                                | 22.42           |
| 30                     | 700                     | 0                                  | 212                                | 43.53           |
| 30                     | 700                     | 0                                  | 106                                | 67.96           |
| 30                     | 800                     | 0                                  | 300                                | 27.23           |
| 30                     | 800                     | 0                                  | 212                                | 45.37           |
| 30                     | 800                     | 0                                  | 106                                | 71.51           |
| 30                     | 900                     | 0                                  | 300                                | 28.96           |
| 30                     | 900                     | 0                                  | 212                                | 47.98           |
| 30                     | 900                     | 0                                  | 106                                | 74.79           |
| 30                     | 1000                    | 0                                  | 300                                | 31.65           |
| 30                     | 1000                    | 0                                  | 212                                | 52.05           |
| 30                     | 1000                    | 0                                  | 106                                | 75.48           |
| 30                     | 1100                    | 0                                  | 300                                | 32.43           |
| 30                     | 1100                    | 0                                  | 212                                | 53.85           |
| 30                     | 1100                    | 0                                  | 106                                | 77.11           |
| 30                     | 1200                    | 0                                  | 300                                | 17.99           |
| 30                     | 1200                    | 0                                  | 212                                | 36.2            |
| 30                     | 1200                    | 0                                  | 106                                | 68.27           |
| 30                     | 1300                    | 0                                  | 300                                | 13.02           |
| 30                     | 1300                    | 0                                  | 212                                | 26.81           |
| 30                     | 1300                    | 0                                  | 106                                | 64.98           |
| 60                     | 600                     | 0                                  | 300                                | 17.79           |
| 60                     | 600                     | 0                                  | 212                                | 32.31           |
| 60                     | 600                     | 0                                  | 106                                | 61.14           |
| 60                     | 700                     | 0                                  | 300                                | 21.43           |
| 60                     | 700                     | 0                                  | 212                                | 37.35           |
| 60                     | 700                     | 0                                  | 106                                | 66.87           |
| 60                     | 800                     | 0                                  | 300                                | 24.38           |
| 60                     | 800                     | 0                                  | 212                                | 44.16           |
| 60                     | 800                     | 0                                  | 106                                | 70.54           |
| 60                     | 900                     | 0                                  | 300                                | 25.13           |
| 60                     | 900                     | 0                                  | 212                                | 45.73           |
| 60                     | 900                     | 0                                  | 106                                | 71.8            |
| 60                     | 1000                    | 0                                  | 300                                | 26.51           |
| 60                     | 1000                    | 0                                  | 212                                | 47.76           |
| 60                     | 1000                    | 0                                  | 106                                | 74.55           |
| 60                     | 1100                    | 0                                  | 300                                | 17.62           |
| 60                     | 1100                    | 0                                  | 212                                | 31.59           |

|    |      |     |     |       |
|----|------|-----|-----|-------|
| 60 | 1100 | 0   | 106 | 70.1  |
| 60 | 1200 | 0   | 300 | 11.11 |
| 60 | 1200 | 0   | 212 | 28.3  |
| 60 | 1200 | 0   | 106 | 60.88 |
| 60 | 1300 | 0   | 300 | 9.98  |
| 60 | 1300 | 0   | 212 | 21.21 |
| 60 | 1300 | 0   | 106 | 58.89 |
| 30 | 600  | 205 | 300 | 27.18 |
| 30 | 600  | 205 | 212 | 49.4  |
| 30 | 600  | 205 | 106 | 84.06 |
| 30 | 700  | 205 | 300 | 37.62 |
| 30 | 700  | 205 | 212 | 62.38 |
| 30 | 700  | 205 | 106 | 86.9  |
| 30 | 800  | 205 | 300 | 47.22 |
| 30 | 800  | 205 | 212 | 67.49 |
| 30 | 800  | 205 | 106 | 93.12 |
| 30 | 900  | 205 | 300 | 48.31 |
| 30 | 900  | 205 | 212 | 70.29 |
| 30 | 900  | 205 | 106 | 94.57 |
| 30 | 1000 | 205 | 300 | 41.13 |
| 30 | 1000 | 205 | 212 | 65.57 |
| 30 | 1000 | 205 | 106 | 88.21 |
| 30 | 1100 | 205 | 300 | 36.15 |
| 30 | 1100 | 205 | 212 | 56.6  |
| 30 | 1100 | 205 | 106 | 80.79 |
| 30 | 1200 | 205 | 300 | 20.81 |
| 30 | 1200 | 205 | 212 | 43.28 |
| 30 | 1200 | 205 | 106 | 77.78 |
| 30 | 1300 | 205 | 300 | 16.15 |
| 30 | 1300 | 205 | 212 | 31.72 |
| 30 | 1300 | 205 | 106 | 68.78 |
| 60 | 600  | 205 | 300 | 23.71 |
| 60 | 600  | 205 | 212 | 47.7  |
| 60 | 600  | 205 | 106 | 83.16 |
| 60 | 700  | 205 | 300 | 30.36 |
| 60 | 700  | 205 | 212 | 53.94 |
| 60 | 700  | 205 | 106 | 87.59 |
| 60 | 800  | 205 | 300 | 35.67 |
| 60 | 800  | 205 | 212 | 64.98 |
| 60 | 800  | 205 | 106 | 90.24 |
| 60 | 900  | 205 | 300 | 45.95 |
| 60 | 900  | 205 | 212 | 66.87 |
| 60 | 900  | 205 | 106 | 92.5  |
| 60 | 1000 | 205 | 300 | 34.78 |
| 60 | 1000 | 205 | 212 | 58.53 |
| 60 | 1000 | 205 | 106 | 84.73 |

|    |      |     |     |       |
|----|------|-----|-----|-------|
| 60 | 1100 | 205 | 300 | 22.5  |
| 60 | 1100 | 205 | 212 | 42.2  |
| 60 | 1100 | 205 | 106 | 75.55 |
| 60 | 1200 | 205 | 300 | 16.54 |
| 60 | 1200 | 205 | 212 | 34.36 |
| 60 | 1200 | 205 | 106 | 70.25 |
| 60 | 1300 | 205 | 300 | 15.67 |
| 60 | 1300 | 205 | 212 | 29.65 |
| 60 | 1300 | 205 | 106 | 61.93 |
| 30 | 600  | 321 | 300 | 31.16 |
| 30 | 600  | 321 | 212 | 56.6  |
| 30 | 600  | 321 | 106 | 86.1  |
| 30 | 700  | 321 | 300 | 39.1  |
| 30 | 700  | 321 | 212 | 64.24 |
| 30 | 700  | 321 | 106 | 89.69 |
| 30 | 800  | 321 | 300 | 48.05 |
| 30 | 800  | 321 | 212 | 70.64 |
| 30 | 800  | 321 | 106 | 94.18 |
| 30 | 900  | 321 | 300 | 49.38 |
| 30 | 900  | 321 | 212 | 74.36 |
| 30 | 900  | 321 | 106 | 95.59 |
| 30 | 1000 | 321 | 300 | 43.42 |
| 30 | 1000 | 321 | 212 | 67.28 |
| 30 | 1000 | 321 | 106 | 91.07 |
| 30 | 1100 | 321 | 300 | 38.63 |
| 30 | 1100 | 321 | 212 | 59.15 |
| 30 | 1100 | 321 | 106 | 84.1  |
| 30 | 1200 | 321 | 300 | 25.64 |
| 30 | 1200 | 321 | 212 | 47.2  |
| 30 | 1200 | 321 | 106 | 82.11 |
| 30 | 1300 | 321 | 300 | 24.01 |
| 30 | 1300 | 321 | 212 | 41.06 |
| 30 | 1300 | 321 | 106 | 70.31 |
| 60 | 600  | 321 | 300 | 25.19 |
| 60 | 600  | 321 | 212 | 46.8  |
| 60 | 600  | 321 | 106 | 84.16 |
| 60 | 700  | 321 | 300 | 31.4  |
| 60 | 700  | 321 | 212 | 57.4  |
| 60 | 700  | 321 | 106 | 88.79 |
| 60 | 800  | 321 | 300 | 45.33 |
| 60 | 800  | 321 | 212 | 66.67 |
| 60 | 800  | 321 | 106 | 91.32 |
| 60 | 900  | 321 | 300 | 49.89 |
| 60 | 900  | 321 | 212 | 68.98 |
| 60 | 900  | 321 | 106 | 93.66 |
| 60 | 1000 | 321 | 300 | 37    |

|    |      |     |     |       |
|----|------|-----|-----|-------|
| 60 | 1000 | 321 | 212 | 64.07 |
| 60 | 1000 | 321 | 106 | 88.43 |
| 60 | 1100 | 321 | 300 | 24    |
| 60 | 1100 | 321 | 212 | 45.7  |
| 60 | 1100 | 321 | 106 | 81.55 |
| 60 | 1200 | 321 | 300 | 20.3  |
| 60 | 1200 | 321 | 212 | 36.91 |
| 60 | 1200 | 321 | 106 | 72.42 |
| 60 | 1300 | 321 | 300 | 16.08 |
| 60 | 1300 | 321 | 212 | 34.88 |
| 60 | 1300 | 321 | 106 | 65.38 |
| 30 | 600  | 780 | 300 | 24.88 |
| 30 | 600  | 780 | 212 | 48.11 |
| 30 | 600  | 780 | 106 | 81.72 |
| 30 | 700  | 780 | 300 | 34.76 |
| 30 | 700  | 780 | 212 | 58.52 |
| 30 | 700  | 780 | 106 | 85.13 |
| 30 | 800  | 780 | 300 | 43.85 |
| 30 | 800  | 780 | 212 | 64.92 |
| 30 | 800  | 780 | 106 | 87.31 |
| 30 | 900  | 780 | 300 | 45.55 |
| 30 | 900  | 780 | 212 | 66.67 |
| 30 | 900  | 780 | 106 | 89.47 |
| 30 | 1000 | 780 | 300 | 36.48 |
| 30 | 1000 | 780 | 212 | 59.57 |
| 30 | 1000 | 780 | 106 | 86.09 |
| 30 | 1100 | 780 | 300 | 34.72 |
| 30 | 1100 | 780 | 212 | 55.79 |
| 30 | 1100 | 780 | 106 | 78.31 |
| 30 | 1200 | 780 | 300 | 19.39 |
| 30 | 1200 | 780 | 212 | 39.76 |
| 30 | 1200 | 780 | 106 | 72.16 |
| 30 | 1300 | 780 | 300 | 14.78 |
| 30 | 1300 | 780 | 212 | 27.74 |
| 30 | 1300 | 780 | 106 | 67.15 |
| 60 | 600  | 780 | 300 | 19.24 |
| 60 | 600  | 780 | 212 | 41.19 |
| 60 | 600  | 780 | 106 | 82.09 |
| 60 | 700  | 780 | 300 | 23.91 |
| 60 | 700  | 780 | 212 | 49.24 |
| 60 | 700  | 780 | 106 | 86.62 |
| 60 | 800  | 780 | 300 | 29.98 |
| 60 | 800  | 780 | 212 | 56.71 |
| 60 | 800  | 780 | 106 | 87.79 |
| 60 | 900  | 780 | 300 | 42.47 |
| 60 | 900  | 780 | 212 | 65.56 |

|    |      |     |     |       |
|----|------|-----|-----|-------|
| 60 | 900  | 780 | 106 | 88.69 |
| 60 | 1000 | 780 | 300 | 27.45 |
| 60 | 1000 | 780 | 212 | 55.09 |
| 60 | 1000 | 780 | 106 | 83.11 |
| 60 | 1100 | 780 | 300 | 21.55 |
| 60 | 1100 | 780 | 212 | 35.53 |
| 60 | 1100 | 780 | 106 | 74.74 |
| 60 | 1200 | 780 | 300 | 13.28 |
| 60 | 1200 | 780 | 212 | 30.65 |
| 60 | 1200 | 780 | 106 | 68.7  |
| 60 | 1300 | 780 | 300 | 12.76 |
| 60 | 1300 | 780 | 212 | 27.66 |
| 60 | 1300 | 780 | 106 | 60.62 |

---
